# Supplementary material
Source: HighWire-hosted journal article supplement (doi:10.1101/rna.076885.120)
Supplement: Supplemental_Table_1.xlsx [file Supplemental_Table_1.xlsx]

## Sheet: halflives_aug2020
Gene	Roadblock-qPCR (h)	Timelapse-seq (h)	Biotin-4sU B cell (h)	Biotin-4sU 3T3 (h)
MYC	0.4697	0.397	0.9	0.4
SOX4	0.472	NA	2.1	NA
AEN	0.5158	0.3989	NA	NA
SESN2	0.5915	0.461	1.3	0.3
CHAC1	0.7018	NA	NA	0.8
NOP2	0.7442	0.7586	NA	NA
SLC7A11	0.7759	0.516	7	NA
FEN1	1.409	NA	4.9	2.9
ATF4	1.595	1.32	1.4	1.8
PCBP1	1.906	1.3495	4.5	2.2
SLC7A5	2.659	1.92	3.2	3
SLC35A4	2.968	2.2079	2.9	4.3
EIF3F	5.48	4.5166	7.2	NA
Timelapse-seq: Schofield JA, Duffy EE, Kiefer L, Sullivan MC, Simon MD. 2018. TimeLapse-seq: adding a temporal dimension to RNA sequencing through nucleoside recoding. Nat Methods.
Biotin-4sU: Friedel CC, Dolken L, Ruzsics Z, Koszinowski UH, Zimmer R. 2009. Conserved principles of mammalian transcriptional regulation revealed by RNA half-life. Nucleic Acids Res 37: e115.
